# Supplementary material
Source: ML conference proceedings conference paper supplement (https://openaccess.thecvf.com/content/WACV2022/html/Hong_Self-Supervised_Knowledge_Transfer_WACV_2022_paper.html)
Supplement: Supplementary file 1 [file Hong_Self-Supervised_Knowledge_Transfer_WACV_2022_supplemental.pdf]

# Supplementary Materials

Seungbum Hong, Jihun Yoon, and Min-Kook Choi  
VisionAI, hutom  
Seoul, Republic of Korea  
{qbration21, jhyoon2020, mkchoi}@hutom.io

Junmo Kim  
KAIST  
Daejeon, Republic of Korea  
junmo.kim@kaist.ac.kr

## Abstract

*This material includes additional experimental results and architecture details of the Self-supervised knowledge transfer (SSKT). For PyTorch implementation, please refer to the following link<sup>1</sup>.*

## 1. SSKT with Multiple Tasks and Different Problem Domains

Self-supervised knowledge transfer (SSKT) supports a training procedure that enables effective transfer learning in a variety of scenarios using deep neural networks. SSKT has a structure that transfers pretrained knowledge naturally, without compromising the training information of the pretrained network or requiring additional supervision in the target task training process. We achieved this goal using the soft label-based knowledge transfer techniques with auxiliary learning through self-supervision, for the various domain of image recognition variants. Final formulation of the SSKT as follows:

$$\begin{aligned} & \operatorname{argmin}_{\theta_t} \left( L(h_t^{\text{prim}}(x_i; \theta_t, D_t, T_t), y_{t,i}^{\text{prim}}) \right. \\ & \quad \left. + \alpha(L(h_t^{\text{aux}}(f_{s_1}(x_i); \theta_t, D_t, T_{s_1}), y_{s_1,i}^{\text{aux}}) \right. \\ & \quad \left. + L(h_t^{\text{aux}}(f_{s_2}(x_i); \theta_t, D_t, T_{s_2}), y_{s_2,i}^{\text{aux}}) + \dots \right. \\ & \quad \left. + L(h_t^{\text{aux}}(f_{s_M}(x_i); \theta_t, D_t, T_{s_M}), y_{s_M,i}^{\text{aux}}) \right). \quad (1) \end{aligned}$$

We define a multi-task network  $h_t(x; \theta_t, D_t, T_t)$ , where  $x$  is the input,  $\theta_t$  is a parameter of the target network,  $D_t$  is a target dataset, and  $T_t$  is the task to be trained.  $\theta_t$  is updated simultaneously through target loss and auxiliary loss during training to solve the primary task.  $h_s(x; \theta_s, D_s, T_s)$  denotes a source network that receives the input  $x$  and delivers knowledge to the target network.  $\theta_s$  denotes a parameter trained by the source task  $T_s$  for the source data

set  $D_s$ .  $\theta_s$  is not updated during the target task training.  $i$  is the  $i^{\text{th}}$  batch of the training data,  $\alpha$  is balanced parameter for total loss, and  $y_{s,i}^{\text{aux}} = h_s(x_i; \theta_s, D_s, T_s)$  is the softmax output from the pretrained source network and conveys the dark knowledge of the pretrained dataset by soft labels. The data transformation function  $f_s$  converts the data type to match the source task to infer the recognition information to the task of the source domain. For example, if  $T_t$  is an action recognition problem using 3D-CNN, the input  $x^{w \times h \times d} \in D_t$  is defined as a three-dimensional tensor. In this case, if a pretrained network for transfer learning is obtained through the image recognition problem  $T_s$  using 2D-CNN,  $f_s : x^{w \times h \times d} \rightarrow \hat{x}^{w \times h}$  should be defined as a function that maps a three-dimensional tensor to a two-dimensional matrix into which  $h_s$  can be input. Up to  $M$  number of different type of transformation functions could be defined. Algorithm1 describes how the SSKT works depending on each transfer learning scenario.

**Transfer Modules Depending on CNN Architecture.** To encourage predicting  $y_{s,i}^{\text{aux}}$  by  $h_t$ , we design bottleneck structure based transfer module supporting auxiliary task using feature output from each convolutional block. Figure 1 shows configuration of transfer modules depending on each CNN architecture for its problem domain. We applied the transfer module to four different CNN architectures such as ResNet [5], DenseNet [6], MobileNet [10], and 3D-ResNet [4] for each problem domain.

## 2. Additional Experiments Results

We provide performance for all experimental configurations for each dataset, in addition to the results contained in the main manuscript. For fair comparison of SSKT, the configurations consist of a combination of the type of source and target network, the presence or absence of a transfer module, and a loss function. For model architecture and hyperparameters setting for training (See Table 1 of the main manuscript). Same as the experiment results of the main manuscript, the datasets of the source task are ImageNet [2] and Places365 [13], and the datasets of the target task are CIFAR10/100 [7], STL10 [1], ImageNet, Places365, PAS-

<sup>1</sup><https://github.com/generation21/generation6011>

---

**Algorithm 1: The SSKT algorithm**

---

**Input** : Target Network( $\theta_t$ ), Source Network( $\theta_s$ ), Dataset( $D_{t,s}$ ), Task ( $T_{t,s}$ ), Transfer Module ( $TM$ )  
**Initialization** : Learning rate= $\alpha$ ,  $j = 0$   
**while convergence do**  
  **else if SSKT with Single Source then**  
    Update  
     $\theta_{j+1} \leftarrow$   
     $\theta_j - \alpha \nabla_{\theta_j} (\mathcal{L}(h_t^{prim}(x_{(i)}; \theta_t, D_t, T_t), y_{(t,i)}^{prim}) + \mathcal{L}(TM(h_s^{aux}(x_{(i)}; \theta_t, D_t, T_s), y_{(s,i)}^{aux})))$   
  **else if SSKT with Multiple Sources then**  
    Update  
     $\theta_{j+1} \leftarrow$   
     $\theta_j - \alpha \nabla_{\theta_j} (\mathcal{L}(h_t^{prim}(x_{(i)}; \theta_t, D_t, T_t), y_{(t,i)}^{prim}) + \sum_{m=1}^M \mathcal{L}(TM(h_{s_m}^{aux}(x_{(i)}; \theta_t, D_t, T_{s_m}), y_{(s_m,i)}^{aux})))$   
  **else if SSKT with Single Source with Different Problem Domains then**  
    Update  
     $\theta_{j+1} \leftarrow$   
     $\theta_j - \alpha \nabla_{\theta_j} (\mathcal{L}(h_t^{prim}(x_{(i)}; \theta_t, D_t, T_t), y_{(t,i)}^{prim}) + \mathcal{L}(TM(h_s^{aux}(f_s(x_{(i)}); \theta_t, D_t, T_s), y_{(s,i)}^{aux})))$   
  **else if SSKT with Multiple Sources with Different Problem Domains then**  
    Update  
     $\theta_{j+1} \leftarrow$   
     $\theta_j - \alpha \nabla_{\theta_j} (\mathcal{L}(h_t^{prim}(x_{(i)}; \theta_t, D_t, T_t), y_{(t,i)}^{prim}) + \sum_{m=1}^M \mathcal{L}(TM(h_{s_m}^{aux}(f_s(x_{(i)}); \theta_t, D_t, T_{s_m}), y_{(s_m,i)}^{aux})))$   
**end**

---

CAL VOC [3], UCF101 [12], and HMDB51 [8]. Tables 1 to 6 provide performance according to the experimental conditions of each dataset. Figure 2 shows the performance changes for the STL10 and PASCAL VOC datasets depending on hyperparameters, the structure of the source and target network, and the presence or absence of a transfer module. The abbreviations for the datasets and model architectures listed in all experimental tables are as follows:

**Datasets:** ImageNet (I), Places365 (P), CIFAR10 (C10), CIFAR100 (C100), STL10 (S10), PASCAL VOC (VOC), UCF101 (U101), and HMDB51 (H51).

**Model architectures:** ResNet (R), DenseNet (D), MobileNetV2 (MV2), and 3D-ResNet (3DR).

Finally, we included the experimental results according to the training setting for further analysis of the SSKT. Table 7 shows the all the combination of comparison results for DenseNet121 and MobileNetV2, and Table 8 shows the evaluations for each experimental setting with finetuning scenario. Table 9 shows the performance comparison with MAXL [9] which is the state-of-the-art self-supervised learning based on auxiliary learning.

Table 1. Performance change according to the configuration of the SSKT for CIFAR10 dataset compared to the training from scratch. All experiments evaluated test performance 3 times from the same random seed for the model. TM stands for Transfer Module and R[depth] stands for ResNet structure. The best performance of each network architecture highlighted in **bold**.

| $T_s$ | $T_t$ | Model | Method  | TM | Loss  | acc.              |
|-------|-------|-------|---------|----|-------|-------------------|
| -     | C10   | R20   | scratch | -  | CE    | 92.19±0.09        |
| P     |       | R20   | SSKT    | x  | CE+CE | 92.21±0.06        |
|       |       | R20   | SSKT    | x  | CE+KD | 92.24±0.14        |
|       |       | R20   | SSKT    | o  | CE+CE | 92.23±0.04        |
|       |       | R20   | SSKT    | o  | CE+KD | 92.25±0.04        |
| I     |       | R20   | SSKT    | x  | CE+CE | 92.28±0.07        |
|       |       | R20   | SSKT    | x  | CE+KD | 92.34±0.07        |
|       |       | R20   | SSKT    | o  | CE+CE | 92.44±0.05        |
|       |       | R20   | SSKT    | o  | CE+KD | 92.29±0.0         |
| P+I   |       | R20   | SSKT    | x  | CE+CE | 91.9±0.1          |
|       |       | R20   | SSKT    | x  | CE+KD | <b>92.46±0.15</b> |
|       |       | R20   | SSKT    | o  | CE+CE | 92.42±0.07        |
|       |       | R20   | SSKT    | o  | CE+KD | 92.22±0.17        |
| -     |       | R32   | scratch | -  | CE    | 93.21±0.09        |
| P     |       | R32   | SSKT    | x  | CE+CE | 92.77±0.14        |
|       |       | R32   | SSKT    | x  | CE+KD | 92.87±0.31        |
|       |       | R32   | SSKT    | o  | CE+CE | 92.65±0.26        |
|       |       | R32   | SSKT    | o  | CE+KD | 92.59±0.22        |
| I     |       | R32   | SSKT    | x  | CE+CE | 93.26±0.08        |
|       |       | R32   | SSKT    | x  | CE+KD | 92.78±0.2         |
|       |       | R32   | SSKT    | o  | CE+CE | 93.25±0.12        |
|       |       | R32   | SSKT    | o  | CE+KD | 92.88±0.07        |
| P+I   |       | R32   | SSKT    | x  | CE+CE | 92.88±0.15        |
|       |       | R32   | SSKT    | x  | CE+KD | 93.07±0.09        |
|       |       | R32   | SSKT    | o  | CE+CE | <b>93.38±0.02</b> |
|       |       | R32   | SSKT    | o  | CE+KD | 93.1±0.22         |

## References

- [1] A. Coates, A. Ng, and H. Lee. An analysis of single-layer networks in unsupervised feature learning. In *In Proc. of AISTAT*, 2011. 1
- [2] J. Deng, W. Dong, R. Socher, L. J. Li, K. Li, and L. Fei-Fei. Imagenet: A large-scale hierarchical image database. In *In Proc. of CVPR*, 2009. 1
- [3] M. Everingham, S. M. A. Eslami, L. V. Gool, C. K. I. Williams, Winn J, and A. Zisserman. The pascal visual object classes challenge - a retrospective. *International Journal of Computer Vision*, 111(1):98–136, 2015. 2
- [4] K. Hara, H. Kataoka, and Y. Satoh. Can spatiotemporal 3d cnns retrace the history of 2d cnns and imagenet? In *In Proc. of CVPR*, 2018. 1
- [5] K. He, X. Zhang, S. Ren, and J. Sun. Deep residual learning for image recognition. In *In Proc. of CVPR*, 2016. 1
- [6] G. Huang, Z. Liu, L. van der Maaten, and K. Q. Weinberger. Densely connected convolutional networks. In *In Proc. of CVPR*, 2017. 1
- [7] A. Krizhevsky. Learning multiple layers of features from tiny images. In *Technical Report*, 2009. 1
- [8] H. Kuehne, H. Jhuang, E. Garrote, T. A. Poggio, and T. Serre. Hmdb: a large video database for human motion recognition. In *In Proc. of ICCV*, 2011. 2

| layer name | output size | 18-layer                         | 34-layer             | 50-layer                          | 101-layer                         | 152-layer                         |
|------------|-------------|----------------------------------|----------------------|-----------------------------------|-----------------------------------|-----------------------------------|
| conv1      | 112×112     |                                  |                      | 7×7, s4, stride 2                 |                                   |                                   |
|            |             | 3×3 max pool, stride 2           |                      |                                   |                                   |                                   |
| conv2_x    | 56×56       | 3×3, 64<br>3×3, 64               | 3×3, 64<br>3×3, 64   | 1×1, 64<br>3×3, 64<br>1×1, 256    | 1×1, 64<br>3×3, 64<br>1×1, 256    | 1×1, 64<br>3×3, 64<br>1×1, 256    |
| conv3_x    | 28×28       | 3×3, 128<br>3×3, 128             | 3×3, 128<br>3×3, 128 | 1×1, 128<br>3×3, 128<br>1×1, 512  | 1×1, 128<br>3×3, 128<br>1×1, 512  | 1×1, 128<br>3×3, 128<br>1×1, 512  |
| conv4_x    | 14×14       | 3×3, 256<br>3×3, 256             | 3×3, 256<br>3×3, 256 | 1×1, 256<br>3×3, 256<br>1×1, 1024 | 1×1, 256<br>3×3, 256<br>1×1, 1024 | 1×1, 256<br>3×3, 256<br>1×1, 1024 |
| conv5_x    | 7×7         | 3×3, 512<br>3×3, 512             | 3×3, 512<br>3×3, 512 | 1×1, 512<br>1×1, 2048             | 1×1, 512<br>3×3, 512<br>1×1, 2048 | 1×1, 512<br>3×3, 512<br>1×1, 2048 |
|            | 1×1         | average pool, 1000-d fc, softmax |                      |                                   |                                   |                                   |
| FLOPs      |             | 1.8×10 <sup>9</sup>              | 3.6×10 <sup>9</sup>  | 3.8×10 <sup>9</sup>               | 7.8×10 <sup>9</sup>               | 11.3×10 <sup>9</sup>              |

| Input                 | Operator    | f | c    | n | s |
|-----------------------|-------------|---|------|---|---|
| 224 <sup>2</sup> × 3  | conv2d      | - | 32   | 1 | 2 |
| 112 <sup>2</sup> × 32 | bottleneck  | 1 | 16   | 1 | 1 |
| 112 <sup>2</sup> × 16 | bottleneck  | 6 | 24   | 2 | 2 |
| 56 <sup>2</sup> × 24  | bottleneck  | 6 | 32   | 3 | 2 |
| 28 <sup>2</sup> × 32  | bottleneck  | 6 | 64   | 4 | 2 |
| 14 <sup>2</sup> × 64  | bottleneck  | 6 | 96   | 3 | 1 |
| 14 <sup>2</sup> × 96  | bottleneck  | 6 | 160  | 3 | 2 |
| 7 <sup>2</sup> × 160  | bottleneck  | 6 | 320  | 1 | 1 |
| 7 <sup>2</sup> × 320  | conv2d 1x1  | - | 1280 | 1 | 1 |
| 7 <sup>2</sup> × 1280 | avgpool 7x7 | - | -    | 1 | - |
| 1 × 1 × 1280          | conv2d 1x1  | - | k    | - | - |

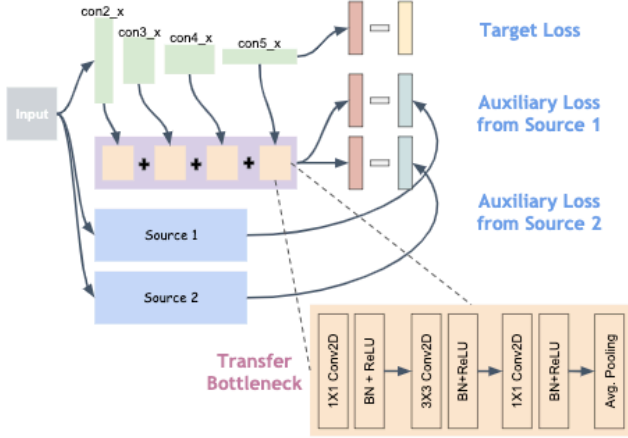

(a) Transfer module in ResNet

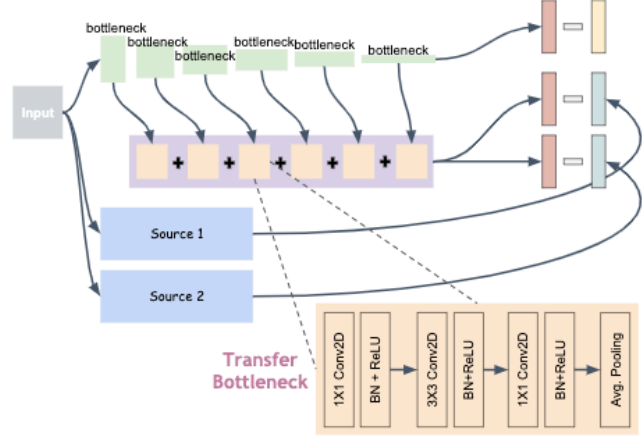

(b) Transfer module in MobileNetV2

| Layers               | Output Size | DenseNet-121                                                | DenseNet-169                     | DenseNet-201                     | DenseNet-264                     |
|----------------------|-------------|-------------------------------------------------------------|----------------------------------|----------------------------------|----------------------------------|
| Convolution          | 112 × 112   |                                                             | 7 × 7 conv, stride 2             |                                  |                                  |
| Pooling              | 56 × 56     |                                                             | 3 × 3 max pool, stride 2         |                                  |                                  |
| Dense Block (1)      | 56 × 56     | 1 × 1 conv × 6<br>3 × 3 conv × 6                            | 1 × 1 conv × 6<br>3 × 3 conv × 6 | 1 × 1 conv × 6<br>3 × 3 conv × 6 | 1 × 1 conv × 6<br>3 × 3 conv × 6 |
| Transition Layer (1) | 56 × 56     | 1 × 1 conv                                                  |                                  |                                  |                                  |
| Dense Block (2)      | 28 × 28     | 2 × 2 average pool, stride 2                                |                                  |                                  |                                  |
| Transition Layer (2) | 28 × 28     | 1 × 1 conv × 12                                             | 1 × 1 conv × 12                  | 1 × 1 conv × 12                  | 1 × 1 conv × 12                  |
| Transition Layer (3) | 28 × 28     | 1 × 1 conv                                                  |                                  |                                  |                                  |
| Dense Block (3)      | 14 × 14     | 1 × 1 conv × 24                                             | 1 × 1 conv × 32                  | 1 × 1 conv × 48                  | 1 × 1 conv × 64                  |
| Transition Layer (4) | 14 × 14     | 1 × 1 conv                                                  |                                  |                                  |                                  |
| Transition Layer (5) | 7 × 7       | 2 × 2 average pool, stride 2                                |                                  |                                  |                                  |
| Dense Block (4)      | 7 × 7       | 1 × 1 conv × 48                                             | 1 × 1 conv × 32                  | 1 × 1 conv × 32                  | 1 × 1 conv × 48                  |
| Classification Layer | 1 × 1       | 7 × 7 global average pool<br>1000D fully-connected, softmax |                                  |                                  |                                  |

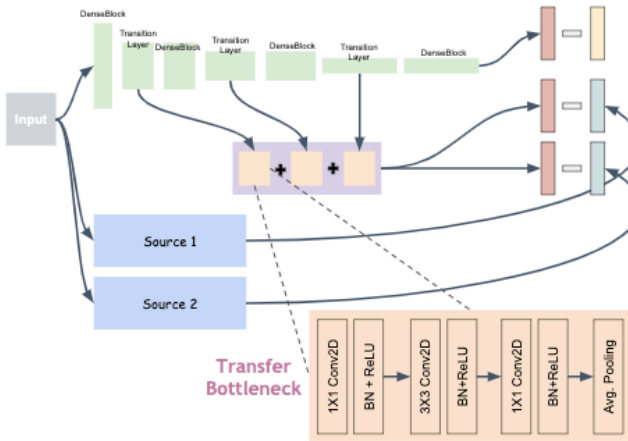

(a) Transfer module in DenseNet

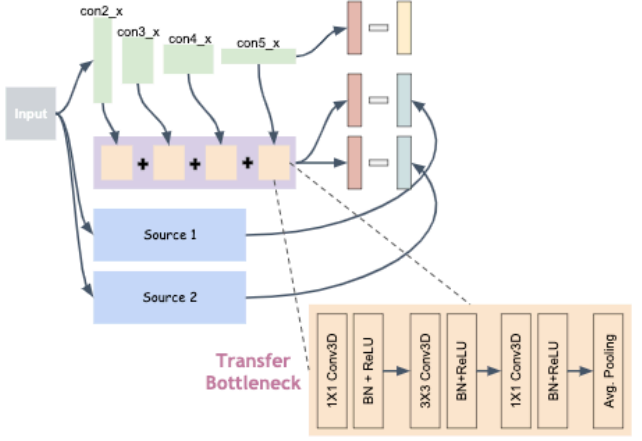

(b) Transfer module in 3D-ResNet

Figure 1. Schematic of the transfer modules for efficient SSKT with different CNN architectures. The transfer module used in the SSKT consists of summation of feature output of bottleneck layers from each convolutional block. Schematic shows and example of the transfer module with different CNN architectures for SSKT using multiple sources.

[9] S. Liu, A. J. Davison, and E. Johns. Self-supervised generalisation with meta auxiliary learning. In *In Proc. of NeurIPS*,

2019, 2, 8

[10] M. Sandler, A. Howard, M. Zhu, A. Zhmoginov, and L. C.

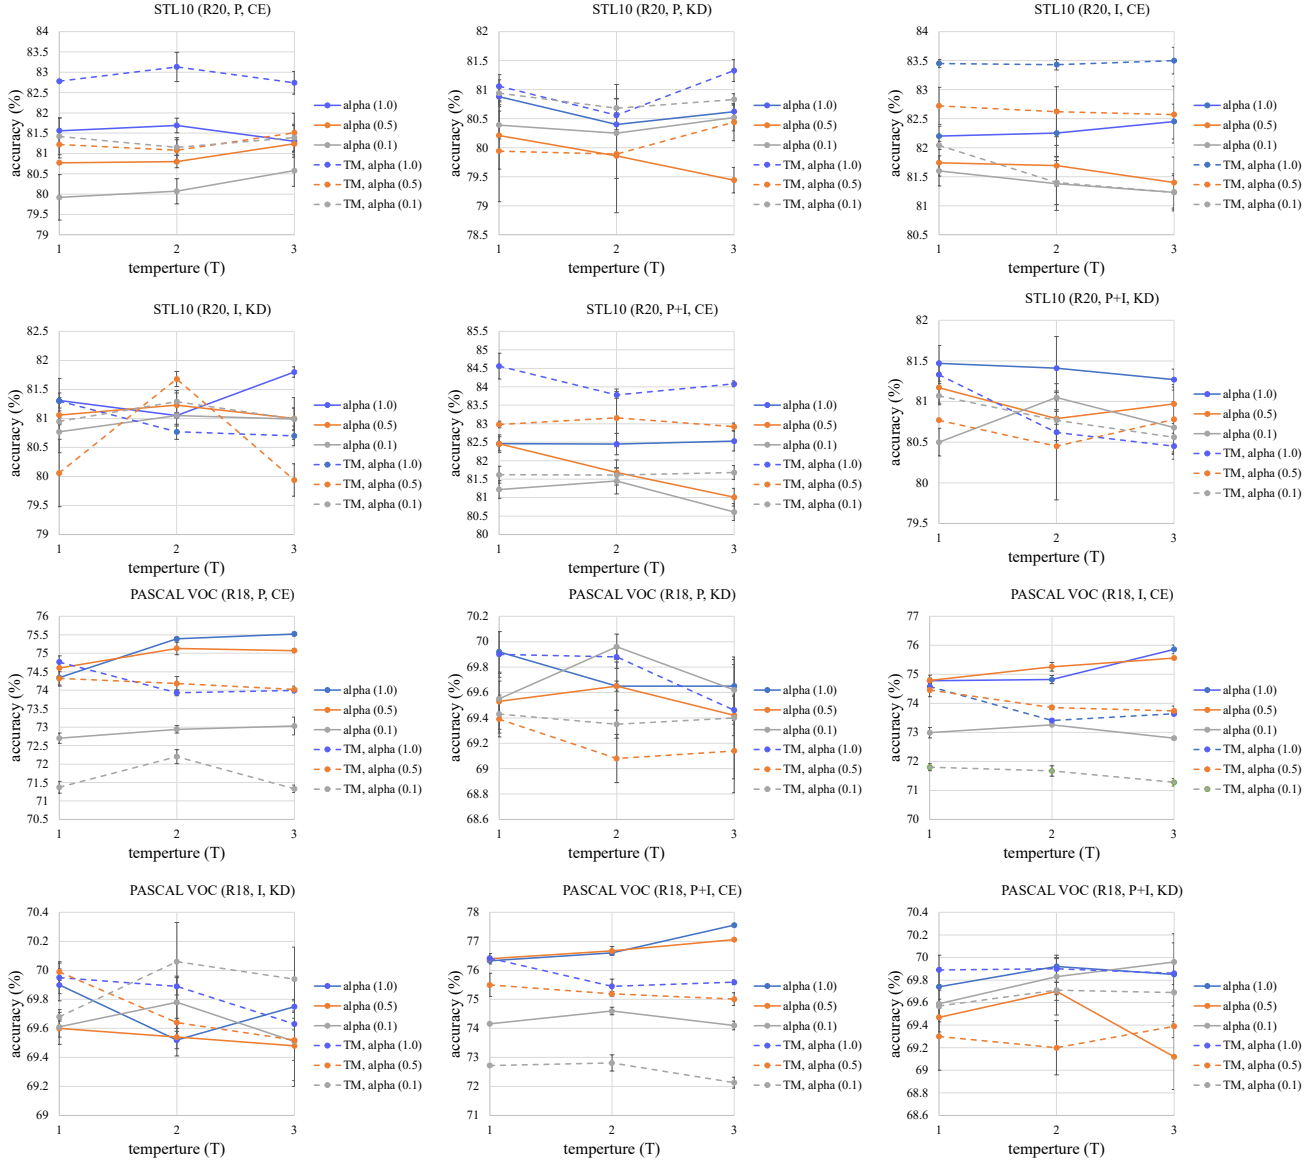

Figure 2. **Parameter optimization of SSKT.** The title of each graph is composed of  $D_t$  (target model,  $T_s$ , auxiliary loss).  $T$  is the temperature parameter of each auxiliary loss, and  $\alpha$  is the balance parameter of the total loss.

Chen. Mobilenetv2: Inverted residuals and linear bottlenecks. In *In Proc. of CVPR*, 2018. 1

- [11] Karen Simonyan and Andrew Zisserman. Very deep convolutional networks for large-scale image recognition. In *In Proc. of ICLR*, 2015. 8
- [12] K. Soomro, A. R. Zamir, and M. Shah. Ucf101: A dataset of 101 human actions classes from videos in the wild. In *CoRR abs/1212.0402*, 2012. 2
- [13] B. Zhou, A. Lapedriza, A. Khosla, A. Oliva, and A. Torralba. Places: A 10 million image database for scene recognition. *IEEE Transactions on Pattern Analysis and Machine Intelligence*, 40(6):1452–1464, 2018. 1

Table 2. Performance change according to the configuration of the SSKT for CIFAR100 dataset compared to the training from scratch.

| $T_s$ | $T_t$ | Model | Method  | TM | Loss  | acc.              |
|-------|-------|-------|---------|----|-------|-------------------|
| -     | C100  | R20   | scratch | -  | CE    | 68.26±0.36        |
| P     |       | R20   | SSKT    | x  | CE+CE | 67.65±0.21        |
|       |       | R20   | SSKT    | x  | CE+KD | 68.01±0.42        |
|       |       | R20   | SSKT    | o  | CE+CE | 67.96±0.27        |
|       |       | R20   | SSKT    | o  | CE+KD | 67.83±0.34        |
| I     |       | R20   | SSKT    | x  | CE+CE | 68.3±0.17         |
|       |       | R20   | SSKT    | x  | CE+KD | 68.37±0.23        |
|       |       | R20   | SSKT    | o  | CE+CE | <b>68.63±0.12</b> |
|       |       | R20   | SSKT    | o  | CE+KD | 68.35±0.1         |
| P+I   |       | R20   | SSKT    | x  | CE+CE | 67.87±0.17        |
|       |       | R20   | SSKT    | x  | CE+KD | 68.13±0.05        |
|       |       | R20   | SSKT    | o  | CE+CE | 68.56±0.23        |
|       |       | R20   | SSKT    | o  | CE+KD | 67.84±0.28        |
| -     |       | R32   | scratch | -  | CE    | 70.33±0.19        |
| P     |       | R32   | SSKT    | x  | CE+CE | 69.97±0.16        |
|       |       | R32   | SSKT    | x  | CE+KD | 69.93±0.21        |
|       |       | R32   | SSKT    | o  | CE+CE | 69.69±0.19        |
|       |       | R32   | SSKT    | o  | CE+KD | 69.92±0.31        |
| I     |       | R32   | SSKT    | x  | CE+CE | 70.6±0.05         |
|       |       | R32   | SSKT    | x  | CE+KD | 70.17±0.14        |
|       |       | R32   | SSKT    | o  | CE+CE | 70.75±0.06        |
|       |       | R32   | SSKT    | o  | CE+KD | 70.0±0.11         |
| P+I   |       | R32   | SSKT    | x  | CE+CE | 69.25±0.58        |
|       |       | R32   | SSKT    | x  | CE+KD | 69.22±0.43        |
|       |       | R32   | SSKT    | o  | CE+CE | <b>70.94±0.36</b> |
|       |       | R32   | SSKT    | o  | CE+KD | 69.44±0.01        |

Table 3. Performance change according to the configuration of the SSKT for STL10 dataset compared to the training from scratch.

| $T_s$ | $T_t$ | Model | Method  | TM | Loss  | acc.              |
|-------|-------|-------|---------|----|-------|-------------------|
| -     | STL10 | R20   | scratch | -  | CE    | 81.15±0.34        |
| P     |       | R20   | SSKT    | x  | CE+CE | 81.56±0.32        |
|       |       | R20   | SSKT    | x  | CE+KD | 80.88±0.19        |
|       |       | R20   | SSKT    | o  | CE+CE | 82.76±0.05        |
|       |       | R20   | SSKT    | o  | CE+KD | 81.06±0.2         |
| I     |       | R20   | SSKT    | x  | CE+CE | 82.2±0.17         |
|       |       | R20   | SSKT    | x  | CE+KD | 80.82±0.14        |
|       |       | R20   | SSKT    | o  | CE+CE | 83.45±0.07        |
|       |       | R20   | SSKT    | o  | CE+KD | 81.3±0.39         |
| P+I   |       | R20   | SSKT    | x  | CE+CE | 82.46±0.24        |
|       |       | R20   | SSKT    | x  | CE+KD | 81.47±0.22        |
|       |       | R20   | SSKT    | o  | CE+CE | <b>84.56±0.35</b> |
|       |       | R20   | SSKT    | o  | CE+KD | 81.33±0.11        |
| -     |       | R32   | scratch | -  | CE    | 81.19±0.17        |
| P     |       | R32   | SSKT    | x  | CE+CE | 82.1±0.14         |
|       |       | R32   | SSKT    | x  | CE+KD | 81.29±0.22        |
|       |       | R32   | SSKT    | o  | CE+CE | 83.06±0.27        |
|       |       | R32   | SSKT    | o  | CE+KD | 81.19±0.12        |
| I     |       | R32   | SSKT    | x  | CE+CE | 82.88±0.33        |
|       |       | R32   | SSKT    | x  | CE+KD | 81.4±0.23         |
|       |       | R32   | SSKT    | o  | CE+CE | 83.68±0.28        |
|       |       | R32   | SSKT    | o  | CE+KD | 81.76±0.18        |
| P+I   |       | R32   | SSKT    | x  | CE+CE | 82.39±0.15        |
|       |       | R32   | SSKT    | x  | CE+KD | 79.8±0.47         |
|       |       | R32   | SSKT    | o  | CE+CE | <b>83.4±0.2</b>   |
|       |       | R32   | SSKT    | o  | CE+KD | 80.05±1.06        |

Table 4. Performance change according to the configuration of the SSKT for ImageNet and Places365 compared to the training from scratch.

| $T_s$ | $T_t$ | Model | Method  | TM | Loss  | acc.         |
|-------|-------|-------|---------|----|-------|--------------|
| -     | P     | R18   | scratch | -  | CE    | 50.92        |
| P     |       | R18   | SSKT    | x  | CE+CE | 54.41        |
|       |       | R18   | SSKT    | x  | CE+KD | 53.42        |
|       |       | R18   | SSKT    | o  | CE+CE | 54.5         |
|       |       | R18   | SSKT    | o  | CE+KD | 54.11        |
| I     |       | R18   | SSKT    | x  | CE+CE | 53.47        |
|       |       | R18   | SSKT    | x  | CE+KD | 53.51        |
|       |       | R18   | SSKT    | o  | CE+CE | 53.67        |
|       |       | R18   | SSKT    | o  | CE+KD | 53.44        |
| P+I   |       | R18   | SSKT    | x  | CE+CE | <b>54.78</b> |
|       |       | R18   | SSKT    | x  | CE+KD | 54.5         |
|       |       | R18   | SSKT    | o  | CE+CE | 54.62        |
|       |       | R18   | SSKT    | o  | CE+KD | 54.5         |
| -     | I     | R18   | scratch | -  | CE    | 64.14        |
| P     |       | R18   | SSKT    | x  | CE+CE | 64.18        |
|       |       | R18   | SSKT    | x  | CE+KD | 64.21        |
|       |       | R18   | SSKT    | o  | CE+CE | 64.99        |
|       |       | R18   | SSKT    | o  | CE+KD | 63.53        |
| I     |       | R18   | SSKT    | x  | CE+CE | 67.79        |
|       |       | R18   | SSKT    | x  | CE+KD | 66.0         |
|       |       | R18   | SSKT    | o  | CE+CE | 67.46        |
|       |       | R18   | SSKT    | o  | CE+KD | 65.65        |
| P+I   |       | R18   | SSKT    | x  | CE+CE | <b>70.57</b> |
|       |       | R18   | SSKT    | x  | CE+KD | 67.42        |
|       |       | R18   | SSKT    | o  | CE+CE | 67.64        |
|       |       | R18   | SSKT    | o  | CE+KD | 66.81        |

Table 5. Performance change according to the configuration of the SSKT for PASCAL VOC compared to the training from scratch.

| $T_s$ | $T_t$ | Model | Method  | TM | Loss   | acc.              |
|-------|-------|-------|---------|----|--------|-------------------|
| -     | VOC   | R18   | scratch | -  | BCE    | 67.28±0.25        |
| P     |       | R18   | SSKT    | x  | BCE+CE | 74.34±0.23        |
|       |       | R18   | SSKT    | x  | BCE+KD | 69.92±0.16        |
|       |       | R18   | SSKT    | o  | BCE+CE | 74.76±0.17        |
|       |       | R18   | SSKT    | o  | BCE+KD | 69.9±0.18         |
| I     |       | R18   | SSKT    | x  | BCE+CE | 74.78±0.09        |
|       |       | R18   | SSKT    | x  | BCE+KD | 69.9±0.35         |
|       |       | R18   | SSKT    | o  | BCE+CE | 74.58±0.11        |
|       |       | R18   | SSKT    | o  | BCE+KD | 69.95±0.19        |
| P+I   |       | R18   | SSKT    | x  | BCE+CE | 76.33±0.0         |
|       |       | R18   | SSKT    | x  | BCE+KD | 69.74±0.17        |
|       |       | R18   | SSKT    | o  | BCE+CE | <b>76.42±0.06</b> |
|       |       | R18   | SSKT    | o  | BCE+KD | 69.89±0.13        |
| -     |       | R34   | scratch | -  | BCE    | 66.0±0.49         |
| P     |       | R34   | SSKT    | x  | BCE+CE | 73.83±0.38        |
|       |       | R34   | SSKT    | x  | BCE+KD | 69.93±0.03        |
|       |       | R34   | SSKT    | o  | BCE+CE | 75.65±0.12        |
|       |       | R34   | SSKT    | o  | BCE+KD | 69.51±0.13        |
| I     |       | R34   | SSKT    | x  | BCE+CE | 74.25±0.12        |
|       |       | R34   | SSKT    | x  | BCE+KD | 70.05±0.14        |
|       |       | R34   | SSKT    | o  | BCE+CE | 75.14±0.14        |
|       |       | R34   | SSKT    | o  | BCE+KD | 70.18±0.11        |
| P+I   |       | R34   | SSKT    | x  | BCE+CE | 75.88±0.1         |
|       |       | R34   | SSKT    | x  | BCE+KD | 70.15±0.09        |
|       |       | R34   | SSKT    | o  | BCE+CE | <b>77.02±0.02</b> |
|       |       | R34   | SSKT    | o  | BCE+KD | 70.58±0.35        |
| -     |       | R50   | scratch | -  | BCE    | 61.16±0.34        |
| P     |       | R50   | SSKT    | x  | BCE+CE | 63.29±1.43        |
|       |       | R50   | SSKT    | x  | BCE+KD | 65.5±0.2          |
|       |       | R50   | SSKT    | o  | BCE+CE | 74.44±0.06        |
|       |       | R50   | SSKT    | o  | BCE+KD | 65.94±0.09        |
| I     |       | R50   | SSKT    | x  | BCE+CE | 63.96±2.74        |
|       |       | R50   | SSKT    | x  | BCE+KD | 66.11±0.32        |
|       |       | R50   | SSKT    | o  | BCE+CE | 74.24±0.05        |
|       |       | R50   | SSKT    | o  | BCE+KD | 65.77±0.13        |
| P+I   |       | R50   | SSKT    | x  | BCE+CE | 69.27±0.21        |
|       |       | R50   | SSKT    | x  | BCE+KD | 66.0±0.29         |
|       |       | R50   | SSKT    | o  | BCE+CE | <b>77.1±0.14</b>  |
|       |       | R50   | SSKT    | o  | BCE+KD | 66.22±0.23        |

Table 6. Performance change according to the configuration of the SSKT for UCF101 and HMDB51 compared to the training from scratch.

| $T_s$ | $T_t$ | Model | Method  | TM | Loss  | acc.         |
|-------|-------|-------|---------|----|-------|--------------|
| -     | U101  | 3DR18 | scratch | -  | CE    | 43.28        |
| P     |       | 3DR18 | SSKT    | x  | CE+CE | 44.1         |
|       |       | 3DR18 | SSKT    | x  | CE+KD | 44.79        |
|       |       | 3DR18 | SSKT    | o  | CE+CE | 45.35        |
|       |       | 3DR18 | SSKT    | o  | CE+KD | 43.95        |
| I     |       | 3DR18 | SSKT    | x  | CE+CE | 46.62        |
|       |       | 3DR18 | SSKT    | x  | CE+KD | 40.35        |
|       |       | 3DR18 | SSKT    | o  | CE+CE | 44.26        |
|       |       | 3DR18 | SSKT    | o  | CE+KD | 38.95        |
| P+I   |       | 3DR18 | SSKT    | x  | CE+CE | <b>52.19</b> |
|       |       | 3DR18 | SSKT    | x  | CE+KD | 43.68        |
|       |       | 3DR18 | SSKT    | o  | CE+CE | 47.09        |
|       |       | 3DR18 | SSKT    | o  | CE+KD | 45.0         |
| -     | H51   | 3DR18 | scratch | -  | CE    | 17.14        |
| P     |       | 3DR18 | SSKT    | x  | CE+CE | 18.18        |
|       |       | 3DR18 | SSKT    | x  | CE+KD | 17.33        |
|       |       | 3DR18 | SSKT    | o  | CE+CE | 18.77        |
|       |       | 3DR18 | SSKT    | o  | CE+KD | 17.59        |
| I     |       | 3DR18 | SSKT    | x  | CE+CE | 18.64        |
|       |       | 3DR18 | SSKT    | x  | CE+KD | 18.12        |
|       |       | 3DR18 | SSKT    | o  | CE+CE | 18.38        |
|       |       | 3DR18 | SSKT    | o  | CE+KD | 18.77        |
| P+I   |       | 3DR18 | SSKT    | x  | CE+CE | 19.75        |
|       |       | 3DR18 | SSKT    | x  | CE+KD | 18.38        |
|       |       | 3DR18 | SSKT    | o  | CE+CE | <b>20.54</b> |
|       |       | 3DR18 | SSKT    | o  | CE+KD | 17.99        |

Table 7. Performance change according to the configuration of the SSKT for STL10 compared to the training from scratch with MobileNet V2 (MV2) and DenseNet121 (D121).

| $T_s$ | $T_t$ | Model | Method  | TM | Loss  | acc.              |
|-------|-------|-------|---------|----|-------|-------------------|
| -     | S10   | MV2   | scratch | -  | CE    | 72.26±0.83        |
| P     |       | MV2   | SSKT    | x  | CE+CE | 75.79±0.19        |
|       |       | MV2   | SSKT    | x  | CE+KD | 74.0±0.35         |
|       |       | MV2   | SSKT    | o  | CE+CE | 75.28±0.49        |
|       |       | MV2   | SSKT    | o  | CE+KD | 73.37±1.8         |
| I     |       | MV2   | SSKT    | x  | CE+CE | 76.08±0.63        |
|       |       | MV2   | SSKT    | x  | CE+KD | 74.39±0.82        |
|       |       | MV2   | SSKT    | o  | CE+CE | 75.35±0.61        |
|       |       | MV2   | SSKT    | o  | CE+KD | 72.6±0.67         |
| P+I   |       | MV2   | SSKT    | x  | CE+CE | 76.69±0.18        |
|       |       | MV2   | SSKT    | x  | CE+KD | 73.29±0.89        |
|       |       | MV2   | SSKT    | o  | CE+CE | <b>76.96±0.39</b> |
|       |       | MV2   | SSKT    | o  | CE+KD | 73.35±0.99        |
| -     |       | D121  | scratch | -  | CE    | 72.02±0.48        |
| P     |       | D121  | SSKT    | x  | CE+CE | 76.17±0.35        |
|       |       | D121  | SSKT    | x  | CE+KD | 74.83±0.59        |
|       |       | D121  | SSKT    | o  | CE+CE | 73.46±0.62        |
|       |       | D121  | SSKT    | o  | CE+KD | 72.55±0.43        |
| I     |       | D121  | SSKT    | x  | CE+CE | 76.0±0.33         |
|       |       | D121  | SSKT    | x  | CE+KD | 73.7±0.22         |
|       |       | D121  | SSKT    | o  | CE+CE | 74.35±0.3         |
|       |       | D121  | SSKT    | o  | CE+KD | 71.13±0.59        |
| P+I   |       | D121  | SSKT    | x  | CE+CE | <b>77.03±0.17</b> |
|       |       | D121  | SSKT    | x  | CE+KD | 73.76±0.84        |
|       |       | D121  | SSKT    | o  | CE+CE | 76.09±0.26        |
|       |       | D121  | SSKT    | o  | CE+KD | 70.94±1.14        |

Table 8. SSKT results for PASCAL VOC, UCF101, and HMDB51 using pretrained weights.  $ft$  stands for finetuning and K stands for Kinetics-400 dataset (Kay et al. 2017).

| $T_s$ | $T_t$ | Model | Method   | TM | Loss  | acc.              |
|-------|-------|-------|----------|----|-------|-------------------|
| -     | VOC   | R18   | $ft$ (I) | -  | CE    | 90.52±0.11        |
| P     |       | R18   | SSKT     | x  | CE+CE | 89.3±0.04         |
|       |       | R18   | SSKT     | x  | CE+KD | <b>92.28±0.06</b> |
|       |       | R18   | SSKT     | o  | CE+CE | 90.83±0.04        |
|       |       | R18   | SSKT     | o  | CE+KD | 92.21±0.05        |
| I     |       | R18   | SSKT     | x  | CE+CE | 91.29±0.03        |
|       |       | R18   | SSKT     | x  | CE+KD | 92.26±0.07        |
|       |       | R18   | SSKT     | o  | CE+CE | 91.58±0.15        |
|       |       | R18   | SSKT     | o  | CE+KD | 92.19±0.09        |
| P+I   |       | R18   | SSKT     | x  | CE+CE | 91.28±0.05        |
|       |       | R18   | SSKT     | x  | CE+KD | 92.19±0.07        |
|       |       | R18   | SSKT     | o  | CE+CE | 91.25±0.08        |
|       |       | R18   | SSKT     | o  | CE+KD | 92.25±0.07        |
| -     | U101  | 3DR18 | $ft$ (K) | -  | CE    | 83.95             |
| P     |       | 3DR18 | SSKT     | x  | CE+CE | 84.53             |
|       |       | 3DR18 | SSKT     | x  | CE+KD | <b>84.58</b>      |
|       |       | 3DR18 | SSKT     | o  | CE+CE | 83.87             |
|       |       | 3DR18 | SSKT     | o  | CE+KD | 83.98             |
| I     |       | 3DR18 | SSKT     | x  | CE+CE | 81.99             |
|       |       | 3DR18 | SSKT     | x  | CE+KD | 83.42             |
|       |       | 3DR18 | SSKT     | o  | CE+CE | 84.29             |
|       |       | 3DR18 | SSKT     | o  | CE+KD | 84.37             |
| P+I   |       | 3DR18 | SSKT     | x  | CE+CE | 78.56             |
|       |       | 3DR18 | SSKT     | x  | CE+KD | 84.14             |
|       |       | 3DR18 | SSKT     | o  | CE+CE | 82.81             |
|       |       | 3DR18 | SSKT     | o  | CE+KD | 84.19             |
| -     | H51   | 3DR18 | $ft$ (K) | -  | CE    | 56.64             |
| P     |       | 3DR18 | SSKT     | x  | CE+CE | 56.77             |
|       |       | 3DR18 | SSKT     | x  | CE+KD | 56.77             |
|       |       | 3DR18 | SSKT     | o  | CE+CE | 57.75             |
|       |       | 3DR18 | SSKT     | o  | CE+KD | <b>57.82</b>      |
| I     |       | 3DR18 | SSKT     | x  | CE+CE | 56.18             |
|       |       | 3DR18 | SSKT     | x  | CE+KD | 56.9              |
|       |       | 3DR18 | SSKT     | o  | CE+CE | 53.3              |
|       |       | 3DR18 | SSKT     | o  | CE+KD | 57.75             |
| P+I   |       | 3DR18 | SSKT     | x  | CE+CE | 54.48             |
|       |       | 3DR18 | SSKT     | x  | CE+KD | 56.05             |
|       |       | 3DR18 | SSKT     | o  | CE+CE | 57.29             |
|       |       | 3DR18 | SSKT     | o  | CE+KD | 57.1              |

Table 9. Comparison with MAXL [9] according to the configuration of the SSKT. V16 denotes VGG16 [11]. F denotes focal loss [9]. C denotes cross-entropy loss.  $TM$  denotes transfer module.

| $T_t$ | $T_t$ Model | MAXL ( $\psi[i]$ ) | SSKT ( $T_s, TM$ )         | $T_s$ Model |
|-------|-------------|--------------------|----------------------------|-------------|
| C10   | V16 (F)     | 93.27±0.09 (2)     | 93.56±0.02 (I, x)          | V16         |
|       | V16 (F)     | 93.47±0.08 (3)     | 94.1±0.1 (I, o)            | V16         |
|       | V16 (F)     | 93.49±0.05 (5)     | 92.94±0.02 (I, x)          | R50         |
|       | V16 (F)     | 93.10±0.08 (10)    | 94.1±0.1 (I, o)            | R50         |
|       | V16 (F)     | -                  | 92.56±0.15 (P, x)          | R50         |
|       | V16 (F)     | -                  | 92.72±0.15 (P, o)          | R50         |
|       | V16 (F)     | -                  | 92.6±0.19 (P+I, x)         | R50, V16    |
|       | V16 (F)     | -                  | 93.06±0.2 (P+I, o)         | R50, V16    |
|       | V16 (F)     | -                  | 92.2±0.08 (P+I, x)         | R50, R50    |
|       | V16 (F)     | -                  | 92.54±0.17 (P+I, o)        | R50, R50    |
|       | V16 (C)     | -                  | 93.78±0.04 (I, x)          | V16         |
|       | V16 (C)     | -                  | <b>94.22±0.02</b> (I, o)   | V16         |
|       | V16 (C)     | -                  | 93.08±0.06 (I, x)          | R50         |
|       | V16 (C)     | -                  | 93.78±0.04 (I, o)          | R50         |
|       | V16 (C)     | -                  | 93.04±0.15 (P, x)          | R50         |
|       | V16 (C)     | -                  | 93.12±0.12 (P, o)          | R50         |
|       | V16 (C)     | -                  | 93.35±0.21 (P+I, x)        | R50, V16    |
|       | V16 (C)     | -                  | 93.67±0.17 (P+I, o)        | R50, V16    |
|       | V16 (C)     | -                  | 93.02±0.11 (P+I, x)        | R50, R50    |
|       | V16 (C)     | -                  | 93.26±0.12 (P+I, o)        | R50, R50    |
|       | R20 (F)     | 91.53±0.33 (2)     | 90.52±0.34 (I, x)          | V16         |
|       | R20 (F)     | 91.52±0.1 (3)      | 91.48±0.03 (I, o)          | V16         |
|       | R20 (F)     | 91.38±0.47 (5)     | 90.88±0.02 (I, x)          | R50         |
|       | R20 (F)     | 91.56±0.16 (10)    | 91.66±0.09 (I, o)          | R50         |
|       | R20 (F)     | -                  | 89.97±0.02 (P, x)          | R50         |
|       | R20 (F)     | -                  | 91.26±0.17 (P, o)          | R50         |
|       | R20 (F)     | -                  | 89.42±0.08 (P+I, x)        | R50, V16    |
|       | R20 (F)     | -                  | 90.93±0.01 (P+I, o)        | R50, V16    |
|       | R20 (F)     | -                  | 90.02±0.21 (P+I, x)        | R50, R50    |
|       | R20 (F)     | -                  | 91.11±0.18 (P+I, o)        | R50, R50    |
|       | R20 (C)     | -                  | 92.28±0.07 (I, x)          | R50         |
|       | R20 (C)     | -                  | 92.44±0.05 (I, o)          | R50         |
|       | R20 (C)     | -                  | 92.21±0.06 (P, x)          | R50         |
|       | R20 (C)     | -                  | 92.25±00.04 (P, o)         | R50         |
|       | R20 (C)     | -                  | 91.9±0.1 (P+I, x)          | R50, R50    |
|       | R20 (C)     | -                  | <b>92.46±0.15</b> (P+I, o) | R50, R50    |
